# Association of Peripheral Blood Pressure with Grey Matter Volume in 19- to 40-Year-Old Adults

## Authors

H. Lina Schaare, MSc<sup>1,2</sup>; Shahrzad Kharabian Masouleh, MSc<sup>1</sup>; Frauke Beyer, MSc<sup>1,10</sup>; Deniz Kumral, MSc<sup>1,3</sup>; Marie Uhlig, MSc<sup>1,2</sup>; Janis D. Reinelt<sup>1</sup>; Andrea M.F. Reiter, PhD<sup>1,4</sup>; Leonie Lampe, MD<sup>1</sup>; Anahit Babayan, PhD<sup>1,3</sup>; Miray Erbey, MSc<sup>1,3</sup>; Josefin Roebbig, MSc<sup>1</sup>; Matthias L. Schroeter, MD, PhD<sup>1,5,9</sup>; Hadas Okon-Singer, PhD<sup>8</sup>; Karsten Müller, PhD<sup>7</sup>; Natacha Mendes, PhD<sup>6</sup>; Daniel S. Margulies, PhD<sup>6</sup>; A. Veronica Witte, PhD<sup>1,10</sup>; Michael Gaebler, PhD<sup>1,3,5</sup>; Arno Villringer, MD<sup>1,3,5,9,10,11</sup>

## Affiliations

<sup>1</sup> Department of Neurology, Max Planck Institute for Human Cognitive and Brain Sciences, Leipzig, Germany

<sup>2</sup> International Max Planck Research School NeuroCom, Leipzig, Germany

<sup>3</sup> MindBrainBody Institute at Berlin School of Mind and Brain, Charité & Humboldt Universität zu Berlin, Germany

<sup>4</sup> Lifespan Developmental Neuroscience, Technische Universität Dresden, Germany

<sup>5</sup> Leipzig Research Centre for Civilization Diseases (LIFE), University of Leipzig, Germany

<sup>6</sup> Max Planck Research Group for Neuroanatomy & Connectivity, Max Planck Institute for Human Cognitive and Brain Sciences, Leipzig, Germany

<sup>7</sup> Nuclear Magnetic Resonance Group, Max Planck Institute for Human Cognitive and Brain Sciences, Leipzig, Germany

<sup>8</sup> Department of Psychology, University of Haifa, Israel

<sup>9</sup> Clinic for Cognitive Neurology, University of Leipzig, Germany

<sup>10</sup> Collaborative Research Centre 1052 'Obesity Mechanisms', Subproject A1, Faculty of Medicine, University of Leipzig, Germany

<sup>11</sup> Center for Stroke Research Berlin, Charité – Universitätsmedizin Berlin, Germany

## Corresponding author

H. Lina Schaare, Department of Neurology, Max Planck Institute for Human Cognitive and Brain Sciences, Stephanstr. 1a, 04103 Leipzig, Germany, Email address:

[schaare@cbs.mpg.de](mailto:schaare@cbs.mpg.de), Phone number: +49 (0) 341-9940-2412.

## 1 **Research in Context**

### 2 **Evidence before this study**

3 We searched PubMed for reports on associations between blood pressure (BP) and grey  
4 matter volumes (GMV) in young adults by use of the MeSH terms [hypertension OR blood  
5 pressure] AND [atrophy OR grey matter OR gray matter OR brain volume] and no language  
6 or date restrictions. We found a systematic review and meta-analysis from 2013 which  
7 identified 28 studies that investigated associations of higher BP with GMV across ages. In  
8 the majority of studies, higher BP or hypertension was associated with lower total or regional  
9 GMV. Qualitatively, these reductions were predominant in frontal and (medial) temporal  
10 lobes. The meta-analysis revealed consistent reductions in hippocampal volumes with high  
11 BP/hypertension across studies. However, none of the reports investigated BP-GMV  
12 associations in young adults, i.e. younger than 40 years of age.

### 13 **Added value of this study**

14 In this image-based meta-analysis of four previously unpublished cross-sectional studies that  
15 included 423 healthy young adults in total, resting BP  $\geq 120/80$  mmHg was associated with  
16 lower grey matter volume in several brain regions, including frontal, parietal and subcortical  
17 structures (including hippocampus). Our study suggests that subtle pressure-related brain  
18 alterations can be observed before 40 years of age and in ranges where BP is still  
19 considered “normal” by current guidelines for the management of hypertension.

### 20 **Implications of all the available evidence**

21 Our study is the first to show that BP-associated grey matter alterations emerge continuously  
22 across the range of BP and earlier in adulthood than previously assumed. Elevated BP is  
23 globally highly prevalent and an important risk factor for cerebrovascular disease and overall  
24 health loss. Our results suggest that treating hypertension or maintaining a lower BP in early  
25 adulthood might be essential for preventing the pathophysiological cascade of asymptomatic  
26 cerebrovascular disease to symptomatic end-organ damage, such as stroke and dementia.

27 In light of our results, large-scale prospective brain imaging studies should include young  
28 adults to investigate whether brain changes related to sub-hypertensive BP in early  
29 adulthood could serve as early biomarkers for subsequent development of cerebrovascular  
30 disease later in life. Such data would provide evidence for future recommendation guidelines  
31 for the management of elevated BP in young adults and for the prevention of  
32 cerebrovascular disease at older ages. Our results also speak in favor of considering  
33 individual BP levels as continuous measures – in addition to a categorical cut-off – which  
34 could facilitate the initiation of early preventive actions.

## 35 **Summary**

36 **Background:** Arterial hypertension (HTN) dramatically increases the risk for stroke and  
37 neurodegenerative disease, but signatures of macro- and microangiopathic brain damage  
38 are already visible in magnetic resonance imaging (MRI) of asymptomatic HTN patients.  
39 Blood pressure (BP) levels that initiate detrimental effects on brain tissue are still undefined.  
40 Their identification may be important for successful BP-management and prevention of  
41 subsequent cerebrovascular disease. Our objective was to test whether elevated BP relates  
42 to lower grey matter volume (GMV) in young adults who had not been diagnosed as  
43 hypertensive ( $\geq 140/90$  mmHg) previously.

44 **Methods:** We related BP and GMV from structural 3 Tesla T1-weighted MRI of 423 healthy  
45 adults between 19-40 years (age= $27.7 \pm 5.3$  years, 177 women, systolic BP  
46 (SBP)= $123.2 \pm 12.2$  mmHg, diastolic BP (DBP)= $73.4 \pm 8.5$  mmHg). Data originated from four  
47 previously unpublished cross-sectional studies conducted in Leipzig, Germany. We  
48 performed voxel-based morphometry on each study separately and combined results in  
49 image-based meta-analyses (IBMA) to assess cumulative effects across studies. Resting BP  
50 was assigned to one of four categories: (1) SBP $<120$  mmHg and DBP $<80$  mmHg, (2) SBP  
51 120-129 mmHg or DBP 80-84 mmHg, (3) SBP 130-139 mmHg or DBP 85-89 mmHg, (4)  
52 SBP $\geq 140$  mmHg or DBP $\geq 90$  mmHg.

53 **Findings:** IBMA yielded: (a) regional GMV decreased linearly as peripheral BP increased;  
54 (b) significantly decreased GMV with higher peripheral BP when comparing individuals in  
55 sub-hypertensive categories 3 and 2, respectively, to those in category 1; (c) lower BP-  
56 related GMV was found in regions including hippocampus, amygdala, thalamus, frontal and  
57 parietal structures (e.g. precuneus).

58 **Interpretation:** In young adults without previously diagnosed HTN, BP $\geq 120/80$  mmHg was  
59 associated with lower GMV in regions that have previously been related to GM decline in  
60 older individuals with manifest HTN. This suggests that subtle pressure-related brain

61 alterations might occur earlier in adulthood than previously assumed and already at sub-  
62 hypertensive BP levels.

## 63 **Introduction**

64 Hypertension (HTN) is highly prevalent and the leading single risk factor for global burden of  
65 disease and overall health loss<sup>1</sup>. In 2015, the global prevalence of HTN, i.e. raised blood  
66 pressure (BP) at or above levels of systolic 140 or diastolic 90 mmHg was around 22%,  
67 affecting 1.13 billion adults worldwide<sup>2</sup>. It is expected that the global number of persons with  
68 HTN increases with population growth and aging<sup>3</sup>.

69 HTN primarily damages peripheral and cerebral blood vessels, where chronically elevated  
70 BP initiates pathophysiological mechanisms (e.g. vascular stiffening, endothelial failure, and  
71 dysfunction of the blood-brain barrier) that result in structural and functional alterations of the  
72 vasculature and insidious brain damage<sup>4</sup>.

73 The risk for symptomatic cerebrovascular disease (CVD, e.g. stroke and vascular dementia)  
74 dramatically increases with manifestation of HTN<sup>4</sup>. Midlife HTN is a major risk factor for  
75 cognitive decline in late-life and has been associated with risk for dementia, including late-  
76 onset Alzheimer's disease (AD)<sup>4-6</sup>.

77 Importantly, HTN is also related to *asymptomatic* cerebrovascular disease, including sub-  
78 clinical functional<sup>7,8</sup> and structural<sup>6-15</sup> brain changes. HTN-related markers of asymptomatic  
79 structural brain damage include white matter (WM) hyperintensities, cortical microbleeds,  
80 microinfarcts, and brain atrophy<sup>15</sup>, that can be evaluated in-vivo with neuroimaging methods  
81 like structural magnetic resonance imaging (MRI). Elevated BP has often been related to  
82 sub-clinical brain volume reductions in the medial temporal and frontal lobes<sup>6,7,10-12,16</sup>.  
83 Hippocampal volumes, in particular, have been consistently associated with HTN-related  
84 reductions<sup>6,10,11,16</sup>. Frontal and medial temporal regions have been proposed to be especially  
85 sensitive to effects of pulsation, hypoperfusion and ischemia, which often result from  
86 increasing pressure<sup>4,16</sup>.

87 Furthermore, computational anatomy analyses have been used to detect subtle cerebral  
88 changes, such as microstructural WM alterations<sup>14</sup> or reductions in regional grey matter<sup>6,12</sup>, in  
89 middle-aged and older adults with elevated BP. However, in addition to HTN, aging and

90 comorbid symptoms (e.g. obesity) also act on brain structure and can hardly be disentangled  
91 from effects of BP. In young, healthy adults, the influence of these confounds should be  
92 minimal, but studies that relate brain volumes to elevated BP in adults younger than 40 years  
93 are lacking. Preliminary evidence from 32 young, normotensive adults, showed that BP-  
94 reactivity correlated with lower amygdala volume<sup>17</sup>.

95 Recent statements suggest that symptomatic clinical disease, as a consequence of elevated  
96 BP, could be prevented by avoiding primary BP elevations and sub-clinical target organ  
97 damage (including brain damage) in early adulthood and middle-age<sup>3,4,18</sup>. However, the  
98 impact of elevated BP on adult brains before the age of 40 is unclear. Moreover, while the  
99 overall burden of raised BP has been addressed by (rather arbitrarily) adjusting the  
100 diagnostic thresholds of HTN downwards, it is still unknown which BP levels initiate  
101 deleterious effects on cerebral tissue.

102 The aim of this study was to investigate if subtle structural brain changes occur in early  
103 adulthood (<40 years) at sub-hypertensive BP levels. We hypothesized that higher BP would  
104 relate to lower regional grey matter volume (GMV) and that this would predominantly affect  
105 frontal and medial temporal lobes, including amygdala and hippocampus.

## 106 **Methods**

107 We applied voxel-based morphometry<sup>19,20</sup> (VBM) to four previously unpublished independent  
108 datasets including young adults aged between 19-40 years without previous diagnosis of  
109 HTN or any other severe, chronic or acute disease. Results from each dataset were  
110 combined in image-based meta-analyses (IBMA) for well-powered, cumulative evaluation of  
111 findings across study differences (i.e. recruitment procedure, inclusion criteria and data  
112 acquisition, supplementary Table 1, supplementary Figure 1). Details on all methods can be  
113 found in supplementary methods.

## 114 **Participants**

115 We included cross-sectional data of 423 young participants from four samples. The samples  
116 were drawn from larger studies that were conducted in Leipzig, Germany, between 2010-  
117 2015: 1. Leipzig Study for Mind-Body-Emotion Interactions, 2. Neural Consequences of  
118 Stress Study, 3. Neuroanatomy and Connectivity Protocol<sup>21</sup>, 4. Leipzig Research Centre for  
119 Civilization Diseases<sup>22</sup>. Inclusion criteria were age between 19-40 years, availability of high-  
120 resolution structural T1-weighted MRI and  $\geq 1$  BP measurements. Participants were excluded  
121 in case of previously diagnosed HTN, intake of antihypertensive drugs or severe diseases  
122 (supplementary Table 1, supplementary Figure 1). The studies were in agreement with the  
123 Declaration of Helsinki and approved by the ethics committee of the medical faculty at the  
124 University of Leipzig, Germany.

## 125 **Data Processing and Statistical Analysis**

### 126 *Blood pressure classification*

127 For statistical analyses, all available BP measurements per participant were averaged to one  
128 mean SBP and DBP, respectively (supplementary methods). Based on these averages, we  
129 categorized BP according to the European guidelines for the management of arterial  
130 hypertension<sup>23</sup>: *category 1* (SBP<120 mmHg and DBP<80 mmHg), *category 2* (SBP 120-129  
131 mmHg or DBP 80-84 mmHg), *category 3* (SBP 130-139 mmHg or DBP 85-89 mmHg) and  
132 *category 4* (SBP $\geq$ 140 mmHg or DBP $\geq$ 90 mmHg).



133 *Voxel-based morphometry (VBM): association of regional GMV and BP within each sample*

134 For each of the four samples, 3 Tesla high-resolution T1-weighted 3-D whole-brain images  
135 (imaging parameters in supplementary Table 2) were processed using VBM and the  
136 diffeomorphic anatomical registration using exponentiated lie algebra (DARTEL) method<sup>19,20</sup>  
137 within SPM12. Voxel-wise general linear models (GLM) were performed to relate BP and  
138 GMV within each sample: we tested for a continuous relationship between GMV and SBP or  
139 DBP, in separate models, with a multiple linear regression *t*-contrast. The overall effect of BP  
140 category on GMV was tested with an Analysis of Variance (ANOVA) *F*-contrast. To assess  
141 differences in GMV between BP categories, the following pairwise *t*-comparisons were  
142 tested: (a) category 4 vs. category 1, (b) category 3 vs. category 1, (c) category 2 vs.  
143 category 1. All analyses included total intracranial volume (TIV), gender and age as  
144 covariates. The influence of body mass index (BMI) did not significantly contribute to the  
145 models and was thus not included as covariate in the analyses.

146 *Image-based meta-analysis (IBMA): association of regional GMV and BP across samples*

147 To evaluate cumulative results from all samples while considering their heterogeneities, we  
148 combined the VBM outcome of each sample in IBMA. Meta-analyses were performed on the  
149 unthresholded *t*-maps with SDM software using default parameters<sup>24</sup>. Statistical significance  
150 of mean effect size maps was evaluated according to validated thresholds of high meta-  
151 analytic sensitivity and specificity<sup>24</sup>: voxel threshold= $p < 0.005$ , peak height threshold=SDM-  
152  $Z > 1.0$  and cluster extent threshold= $k \geq 10$  voxels.

153 *IBMA of regions of interest (ROI): association of regional GMV and BP across samples in*  
154 *hippocampus and amygdala*

155 We performed IBMA within atlas-defined masks to test if regional bilateral hippocampal and  
156 amygdalar volumes related to SBP, DBP and BP categories, respectively. The statistical  
157 thresholds were defined as  $p < 0.05$ , SDM- $Z > 1.0$  and  $k \geq 1$  voxels.

158 **Data Sharing**

159 Results (i.e. unthresholded whole-brain statistical maps) from VBM analyses of each sample  
160 and from all IBMAs can be found online in the public repository NeuroVault for detailed  
161 inspection (<http://neurovault.org/collections/FDWHFSYZ/>). Raw data of samples 1-3 can be  
162 found at <https://www.openfmri.org/dataset/ds000221/>.

## 163 **Results**

### 164 **Sample characteristics**

165 The characteristics of the total sample by BP category are reported in Table 1. The total  
166 sample included 423 participants between 19-40 years of whom 177 were women (42%).  
167 Mean (SD) age was 27.7 (5.3) years. Gender, age, SBP, DBP, and body mass index differed  
168 significantly between BP categories (all  $p < 0.001$ ).

### 169 **VBM: association of regional GMV and BP within each sample**

170 Figure 1 shows differences in regional GMV between BP categories for each of the four  
171 samples at a voxel threshold of  $p_{\text{uncorrected}} < 0.001$  (ANOVA  $F$ -contrast). Results show  
172 significant clusters of various extents that were distributed heterogeneously between the  
173 samples. In sample 1, one cluster in the left posterior insula survived correction for multiple  
174 comparisons (cluster  $p_{\text{FamilyWiseError}} < 0.05$ ).

### 175 **IBMA: association of regional GMV and BP across samples**

#### 176 *Meta-analytic linear relations between GMV and BP*

177 As expected, increases in systolic and diastolic BP were associated with lower GMV.  
178 Specifically, higher SBP related to lower GMV in right paracentral/cingulate areas, bilateral  
179 inferior frontal gyrus (IFG), bilateral sensorimotor cortex, bilateral superior temporal gyrus,  
180 bilateral cuneus cortex, and right thalamus (Figure 2A, Table 2). Increases in diastolic BP  
181 were related to lower GMV in bilateral anterior insula, frontal regions, right midcingulate  
182 cortex, bilateral inferior parietal areas, and right superior temporal gyrus (Figure 2B, Table 2).

#### 183 *Meta-analytic differences in regional GMV between BP categories*

184 Meta-analytic results for category 4 (highest BP) compared to category 1 (lowest BP) yielded  
185 lower regional GMV in frontal, cerebellar, parietal, occipital, and cingulate regions (Figure  
186 2C). Table 2 describes the specific regions with lower GMV, including bilateral IFG, right  
187 midcingulate cortex, and right precuneus.

188 We also compared GMV of individuals at sub-hypertensive levels (category 3 and 2,  
189 respectively) to GMV of individuals in category 1. Figure 2D shows meta-analysis results for  
190 the comparison between category 3 and category 1. Compared to category 1, category 3  
191 was associated with lower GMV in bilateral IFG, sensorimotor cortices, bilateral middle  
192 temporal gyrus, right insula, right occipital regions, left parietal, bilateral thalamus, left  
193 anterior cingulate cortex, and left precuneus (Table 2).

194 Figure 2E illustrates brain regions that yielded meta-analytic GMV decreases for category 2  
195 compared to category 1. These include left frontal regions, right inferior occipital gyrus,  
196 bilateral temporal regions, precuneus and inferior parietal regions (supramarginal and  
197 angular gyri), as well as midcingulate cortex (Table 2).

198 *Meta-analytic differences in regional hippocampal and amygdalar volumes between BP*  
199 *categories*

200 In this IBMA ROI comparison, SBP was negatively correlated with bilateral posterior medial  
201 hippocampal volume (Figure 3). DBP negatively correlated with left hippocampal volume and  
202 right anterior hippocampal volume. Furthermore, all higher BP categories were associated  
203 with lower regional hippocampal volume when compared to the lowest BP category 1 (Figure  
204 3). Compared to category 1 and across samples, BP category 4 was predominantly  
205 associated with lower left medial posterior hippocampus volume and category 3 with lower  
206 bilateral posterior and left medial hippocampus volume. Smaller volume associated with  
207 category 2 was predominantly located in left lateral anterior hippocampus. Category 4 vs.  
208 category 1 and the correlation with SBP and DBP also yielded significantly lower regional  
209 volume in bilateral amygdala, respectively. Effect sizes highly varied across samples (Figure  
210 3).

## 211 Discussion

212 In this image-based meta-analysis of four previously unpublished independent samples, we  
213 found that elevated, sub-hypertensive BP was correlated with lower GMV in several brain  
214 regions, including parietal, frontal, and subcortical structures in young adults (<40 years).  
215 These regions are consistent with the regional GM reductions observed in middle-aged and  
216 older individuals with HTN<sup>6,7,10–12,16</sup>. Our results show that BP-associated GM alterations  
217 emerge earlier in adulthood than previously assumed and continuously across the range of  
218 BP.

219 Specifically, we found that BP was associated with lower hippocampal volume. The  
220 hippocampal formation and surrounding structures are known to be affected by HTN<sup>6,9–11,16</sup>  
221 but also by neurodegenerative diseases, such as AD<sup>25</sup>. Raised midlife BP is a major risk  
222 factor for vascular dementia and has been hypothesized to interact with AD pathology<sup>4,5</sup>.  
223 Raised midlife BP has been associated with lower post-mortem brain weight, increased  
224 numbers of hippocampal neurofibrillary tangles, and increased numbers of hippocampal and  
225 cortical neuritic plaques<sup>9</sup>. In a meta-analytic evaluation of HTN-effects on total GMV and on  
226 hippocampal volume, volume reductions across studies were only consistently found for the  
227 hippocampus<sup>16</sup>. In line with these findings, our results showed that hippocampal volume was  
228 affected by higher BP also in a considerably younger sample. The effects in hippocampus,  
229 however, only exceeded statistical thresholds in ROI analyses, similar to previous reports of  
230 hippocampal volume reductions in older samples with manifest HTN that were all ROI-  
231 based<sup>6,10,11,16</sup>.

232 We furthermore observed reductions in amygdalar volume and thalamic volume with  
233 increasing BP, notably already below levels which are currently regarded as hypertensive.  
234 Amygdalar and thalamic nuclei are substantially involved in BP regulation as they receive  
235 baroreceptor afferent signals via the brainstem and mesencephalic nuclei, relaying these  
236 signals to primary cortical regions of viscerosensory integration, such as anterior cingulate  
237 cortex and insula<sup>26</sup>. It has been shown that lower amygdalar volume correlates with  
238 increased BP-reactivity during cognitive demand among young normotensive adults<sup>17</sup>.

239 Previous studies have reported lower thalamic volume in HTN<sup>6</sup>, heart failure<sup>27</sup>, asymptomatic  
240 carotid stenosis<sup>28</sup>, and aging<sup>29</sup>. Higher systolic BP has also been related to higher mean  
241 diffusivity of white matter thalamic radiations<sup>14</sup>. Occurrence of neurofibrillary tangles in  
242 thalamus has been described in the earliest stages of AD neuropathology<sup>25</sup>, which could be  
243 mediated by elevated BP as described above. Our results are in line with accumulating  
244 evidence of amygdalar and thalamic involvement in cardiovascular (dys-) regulation, but may  
245 also reflect early pathology in these regions.

246 Beyond subcortical structures, we found volume reductions in cortical regions: cingulate  
247 volume and insular volume were markedly reduced with increasing DBP. As noted above,  
248 these regions constitute primary cortical sites of afferent viscerosensory integration and  
249 modulate homeostasis via efferents to brainstem nuclei<sup>26</sup>. Lesions in cingulate cortex and  
250 insula result in altered cardiovascular regulation, increased sympathetic tone<sup>30,31</sup> and  
251 myocardial injury<sup>32</sup>. Both regions are also critical for the appraisal and regulation of emotion  
252 and stress<sup>26</sup>. Thus, structural alterations in these regions may contribute to insidious BP  
253 elevations via sympathetic pathways.

254 Frontal and parietal volumes were affected in all our statistical comparisons. The precuneus  
255 cortex, especially, was associated with lower GMV in BP categories 4, 3, and 2 compared to  
256 category 1. Inferior parietal and precuneus cortex, in addition to medial temporal structures,  
257 have been described as AD-signature regions, where cortical thinning can be observed years  
258 before clinical symptoms arise<sup>33</sup>. HTN is a risk factor for vascular dementia and AD and  
259 increasing BP has been shown to predict volume reductions in AD-signature regions  
260 longitudinally<sup>6</sup>. In the same study, BP also predicted volume loss in other brain regions, such  
261 as frontal lobe and subcortical gray matter<sup>6</sup>. Similarly, albeit cross-sectionally, our results  
262 indicate BP-related GMV decreases in *specific* regions, such as hippocampal, frontal and  
263 AD-related regions which have been suggested to be especially vulnerable to vascular and  
264 neurodegenerative changes<sup>6,7,9-12,16,33</sup>. Evaluating our results overall, we found GMV  
265 reductions in all major brain lobes which additionally hints to a *diffuse* effect of vascular

266 damage on brain tissue. Some previous studies did not find relations between HTN and brain  
267 volume reductions, but associated HTN with other forms of structural or functional brain  
268 damage, such as white matter injury<sup>34</sup> or reduced cerebral perfusion<sup>35</sup>.

269 A key aspect of diverging results is the heterogeneity of methods used to assess brain  
270 volumes. Earlier investigations of BP effects on brain tissues have applied manual or  
271 automated volumetric methods to quantify total brain volumes in pre-selected ROIs<sup>10,11,13</sup>.  
272 The focus of this study was to employ computational anatomy methods to assess *regional*  
273 *GM differences across the whole brain*. We found significant differences between BP groups  
274 using VBM but not in the analysis of total brain volumes (see supplementary methods and  
275 results). This supports the view that VBM is a sensitive measure to quantify regional  
276 morphological differences<sup>36</sup> which might be undetected from the analysis of total brain  
277 volumes alone. In addition, we employed IBMA which results in effects that are consistent  
278 across studies and that may otherwise be neglected at sub-threshold. Investigating effects of  
279 BP on regional vs. total brain volumes at all stages of health and disease thus warrants  
280 further research with standardized methods to identify neuropathological mechanisms.

281 The causes of brain volume loss in HTN involve complex interactions of different  
282 pathophysiological mechanisms that still need to be fully elucidated and cannot be  
283 addressed with our data. It is assumed that vascular stiffness, endothelial failure and a  
284 dysfunctional blood-brain barrier are precursors of cerebral small and large vessel disease  
285 that reduce cerebral blood flow, disturb autoregulatory adjustment and decrease vasomotor  
286 reactivity, which may impair perivascular central nervous waste clearance systems<sup>4</sup>.  
287 Consequently, demyelination, apoptosis and intoxication of neurons and glial cells, as well as  
288 grey and white matter necrosis accumulate and can be observed with neuroimaging on a  
289 macroscopic scale. GMV reductions assessed by VBM, as reported in our study, can thus  
290 arise from neuronal loss, but also from alterations of glial cells or composition of  
291 microstructural or metabolic tissue properties<sup>37</sup>. Our findings point to an early effect of such  
292 mechanisms on GM integrity which is present in the absence of overt disease, such as HTN,

293 and in young age. Indicators of early atherosclerosis in major peripheral arteries can already  
294 be detected in youth<sup>38</sup>. Recently, arterial stiffness has also been associated with WM and GM  
295 alterations among adults between 24 and 76 years of age<sup>39</sup>. Thus, already early and subtle  
296 vascular changes, deficient cerebral perfusion and impaired perivascular clearance systems  
297 may initiate and sustain neuropathology from early to late adulthood.

298 The cross-sectional design of our four study samples limits the interpretation frame for the  
299 results presented. Causality between BP and brain damage cannot be assessed with these  
300 data, but is crucial for implications of early signs of cerebrovascular disease. Furthermore,  
301 the study samples differed regarding recruitment, gender distribution, sample size,  
302 prevalence of high BP, and data acquisition methods (BP and MRI) which might not  
303 represent the general population or standard acquisition protocols (e.g. only one BP  
304 measurement in sample 3). However, by combining the samples in IBMA, we addressed this  
305 limitation and accounted for within and between sample heterogeneity and evaluated effects  
306 cumulatively. Moreover, this approach enabled us to investigate the expected small effects of  
307 BP-related GM alterations in a well-powered total sample of over 400 young adults. HTN is  
308 also the most important risk factor for WM damage<sup>4,13</sup> and sub-clinical WM injury in relation  
309 to elevated BP levels has recently been reported in 19- to 63-year-old adults<sup>14</sup>. As our study  
310 included only GM measures, we cannot assess mediating effects of WM injury on GMV  
311 differences. However, we did not observe any significant differences in Fazekas scores for  
312 WM lesions between BP categories.

313 For the first time, we show that BP-related brain alterations may occur in early adulthood and  
314 at BP levels below current thresholds for manifest HTN. Contrary to assumptions that BP-  
315 related brain damage arises over years of manifest disease our data suggest that subtle  
316 pressure-related GM alterations can be observed in young adults without previously  
317 diagnosed HTN. In light of our results, large-scale cohort studies should investigate whether  
318 sub-hypertensive BP and related brain changes in early adulthood increase the risk for  
319 subsequent development of CVD later in life. Gaining insights whether and how the brain is



320 globally affected by vascular changes or if these are specific to susceptible regions could  
321 help identifying neuroimaging biomarkers for the earliest stages of CVD. Such data would  
322 provide evidence for future guidelines to formulate informed recommendations for BP-  
323 management in young adults, which are critical for the prevention of CVD. Lifestyle  
324 interventions and neurobehavioral therapy have recently been suggested to benefit CVD  
325 prevention<sup>18</sup>. Our results highlight the importance of taking BP levels as a continuous  
326 measure into consideration which could help initiate such early preventive measures.

327 **Author Contributions**

328 *Study concept and design:* Schaare, Villringer.

329 *Statistical analysis:* Schaare.

330 *Acquisition or interpretation of data:* All authors.

331 *Drafting of the manuscript:* Schaare, Villringer.

332 *Critical revision of the manuscript:* All authors.

333

334 **Declaration of Interests**

335 We have no competing interests.

336

337 **Acknowledgements**

338 We thank all volunteers for their participation in any of the studies. Furthermore, we thank all

339 researchers, technicians and students who planned, collected, entered and curated data

340 used in this manuscript.

## 341 References

- 342 1. Forouzanfar MH, Afshin A, Alexander LT, et al. Global, regional, and national  
343 comparative risk assessment of 79 behavioural, environmental and occupational, and  
344 metabolic risks or clusters of risks, 1990–2015: a systematic analysis for the Global  
345 Burden of Disease Study 2015. *Lancet*. 2016;388(10053):1659-1724.  
346 doi:10.1016/S0140-6736(16)31679-8.
- 347 2. NCD Risk Factor Collaboration (NCD-RisC). Worldwide trends in blood pressure from  
348 1975 to 2015: a pooled analysis of 1479 population-based measurement studies with  
349 19.1 million participants. *Lancet*. 2016;389(10064):634-647. doi:10.1016/S0140-  
350 6736(16)31919-5.
- 351 3. Olsen MH, Angell SY, Asma S, et al. A call to action and a lifecourse strategy to  
352 address the global burden of raised blood pressure on current and future generations:  
353 the Lancet Commission on hypertension. *Lancet*. 2016;388(10060):2665-2712.  
354 doi:10.1016/S0140-6736(16)31134-5.
- 355 4. Iadecola C, Yaffe K, Biller J, et al. Impact of hypertension on cognitive function : a  
356 scientific statement from the American Heart Association. *Hypertension*. 2016;68:e67–  
357 e94. doi:10.1161/HYP.0000000000000053.
- 358 5. Norton S, Matthews FE, Barnes DE, Yaffe K, Brayne C. Potential for primary  
359 prevention of Alzheimer’s disease: An analysis of population-based data. *Lancet*  
360 *Neurol*. 2014;13(8):788-794. doi:10.1016/S1474-4422(14)70136-X.
- 361 6. Power MC, Schneider ALC, Wruck L, et al. Life-course blood pressure in relation to  
362 brain volumes. *Alzheimer’s Dement*. 2016;12(8):890-899.  
363 doi:10.1016/j.jalz.2016.03.012.
- 364 7. Hajjar I, Zhao P, Alsop D, et al. Association of blood pressure elevation and nocturnal  
365 dipping with brain atrophy, perfusion and functional measures in stroke and nonstroke  
366 individuals. *Am J Hypertens*. 2010;23(1):17-23. doi:10.1038/ajh.2009.187.
- 367 8. Launer LJ, Lewis CE, Schreiner PJ, et al. Vascular factors and multiple measures of  
368 early brain health: CARDIA brain MRI study. Ikram MA, ed. *PLoS One*.  
369 2015;10(3):e0122138. doi:10.1371/journal.pone.0122138.
- 370 9. Petrovitch H, White LR, Izmirilian G, et al. Midlife blood pressure and neuritic plaques,  
371 neurofibrillary tangles, and brain weight at death: the HAAS. *Neurobiol Aging*.  
372 2000;21(1):57-62. doi:10.1016/S0197-4580(00)00106-8.
- 373 10. den Heijer T, Launer LJ, Prins ND, et al. Association between blood pressure, white  
374 matter lesions, and atrophy of the medial temporal lobe. *Neurology*. 2005;64(2):263-  
375 267. doi:10.1212/01.WNL.0000149641.55751.2E.
- 376 11. Raz N, Lindenberger U, Rodrigue KM, et al. Regional brain changes in aging healthy  
377 adults: general trends, individual differences and modifiers. *Cereb Cortex*.  
378 2005;15(11):1676-1689. doi:10.1093/cercor/bhi044.
- 379 12. Leritz EC, Salat DH, Williams VJ, et al. Thickness of the human cerebral cortex is  
380 associated with metrics of cerebrovascular health in a normative sample of community  
381 dwelling older adults. *Neuroimage*. 2011;54(4):2659-2671.  
382 doi:10.1016/j.neuroimage.2010.10.050.
- 383 13. Debette S, Seshadri S, Beiser A, et al. Midlife vascular risk factor exposure  
384 accelerates structural brain aging and cognitive decline. *Neurology*. 2011;77(5):461-  
385 468. doi:10.1212/WNL.0b013e318227b227.

- 386 14. Maillard P, Seshadri S, Beiser A, et al. Effects of systolic blood pressure on white-  
387 matter integrity in young adults in the Framingham Heart Study: a cross-sectional  
388 study. *Lancet Neurol.* 2012;11(12):1039-1047. doi:10.1016/S1474-4422(12)70241-7.
- 389 15. Muller M, Sigurdsson S, Kjartansson O, et al. Joint effect of mid- and late-life blood  
390 pressure on the brain: the AGES-Reykjavik study. *Neurology.* 2014;82(24):2187-2195.  
391 doi:10.1212/WNL.0000000000000517.
- 392 16. Beauchet O, Celle S, Roche F, et al. Blood pressure levels and brain volume  
393 reduction: a systematic review and meta-analysis. *J Hypertens.* 2013;31(8):1502-  
394 1516. doi:10.1097/HJH.0b013e32836184b5.
- 395 17. Gianaros PJ, Sheu LK, Matthews K a, Jennings JR, Manuck SB, Hariri AR. Individual  
396 differences in stressor-evoked blood pressure reactivity vary with activation, volume,  
397 and functional connectivity of the amygdala. *J Neurosci.* 2008;28(4):990-999.  
398 doi:10.1523/JNEUROSCI.3606-07.2008.
- 399 18. Grossman DC, Bibbins-Domingo K, Curry SJ, et al. Behavioral Counseling to Promote  
400 a Healthful Diet and Physical Activity for Cardiovascular Disease Prevention in Adults  
401 Without Cardiovascular Risk Factors. *JAMA.* 2017;318(2):167.  
402 doi:10.1001/jama.2017.7171.
- 403 19. Ashburner J, Friston KJ. Voxel-based morphometry--the methods. *Neuroimage.*  
404 2000;11(6 Pt 1):805-821. doi:10.1006/nimg.2000.0582.
- 405 20. Ashburner J. A fast diffeomorphic image registration algorithm. *Neuroimage.*  
406 2007;38(1):95-113. doi:10.1016/j.neuroimage.2007.07.007.
- 407 21. Mendes N, Oligschlaeger S, Lauckner ME, et al. A functional connectome phenotyping  
408 dataset including cognitive state and personality measures. *bioRxiv.* 2017.  
409 <http://www.biorxiv.org/content/early/2017/07/18/164764>. Accessed July 19, 2017.
- 410 22. Loeffler M, Engel C, Ahnert P, et al. The LIFE-Adult-Study: objectives and design of a  
411 population-based cohort study with 10,000 deeply phenotyped adults in Germany.  
412 *BMC Public Health.* 2015;15:691. doi:10.1186/s12889-015-1983-z.
- 413 23. Mancia G, Fagard R, Narkiewicz K, et al. 2013 ESH/ESC Guidelines for the  
414 management of arterial hypertension. *Eur Heart J.* 2013;34(28):2159-2219.  
415 doi:10.1093/eurheartj/eh151.
- 416 24. Radua J, Mataix-Cols D, Phillips ML, et al. A new meta-analytic method for  
417 neuroimaging studies that combines reported peak coordinates and statistical  
418 parametric maps. *Eur Psychiatry.* 2012;27(8):605-611.  
419 doi:10.1016/j.eurpsy.2011.04.001.
- 420 25. Braak H, Braak E. Neuropathological staging of Alzheimer-related changes. *Acta*  
421 *Neuropathol.* 1991;82:239-259. doi:10.1007/BF00308809.
- 422 26. Critchley HD, Harrison N a. Visceral influences on brain and behavior. *Neuron.*  
423 2013;77(4):624-638. doi:10.1016/j.neuron.2013.02.008.
- 424 27. Woo MA, Macey PM, Fonarow GC, Hamilton MA, Harper RM. Regional brain gray  
425 matter loss in heart failure. *J Appl Physiol.* 2003;95(2):677-684.  
426 doi:10.1152/jappphysiol.00101.2003.
- 427 28. Avelar WM, D'Abreu A, Coan AC, et al. Asymptomatic carotid stenosis is associated  
428 with gray and white matter damage. *Int J Stroke.* 2015;10(8):1197-1203.  
429 doi:10.1111/ijs.12574.

- 430 29. Lorio S, Lutti A, Kherif F, et al. Disentangling in vivo the effects of iron content and  
431 atrophy on the ageing human brain. *Neuroimage*. 2014;103:280-289.  
432 doi:10.1016/j.neuroimage.2014.09.044.
- 433 30. Critchley HD, Mathias CJ, Josephs O, et al. Human cingulate cortex and autonomic  
434 control: Converging neuroimaging and clinical evidence. *Brain*. 2003;126(10):2139-  
435 2152. doi:10.1093/brain/awg216.
- 436 31. Oppenheimer SM, Kedem G, Martin WM. Left-insular cortex lesions perturb cardiac  
437 autonomic tone in humans. *Clin Auton Res*. 1996;6(3):131-140.  
438 doi:10.1007/BF02281899.
- 439 32. Krause T, Werner K, Fiebach JB, et al. Stroke in right dorsal anterior insular cortex Is  
440 related to myocardial injury. *Ann Neurol*. 2017;81(4):502-511. doi:10.1002/ana.24906.
- 441 33. Dickerson BC, Stoub TR, Shah RC, et al. Alzheimer-signature MRI biomarker predicts  
442 AD dementia in cognitively normal adults. *Neurology*. 2011;76(16):1395-1402.  
443 doi:10.1212/WNL.0b013e3182166e96.
- 444 34. Allan CL, Zsoldos E, Filippini N, et al. Lifetime hypertension as a predictor of brain  
445 structure in older adults: cohort study with a 28-year follow-up. *Br J Psychiatry*.  
446 2015;206(4).
- 447 35. Muller M, van der Graaf Y, Visseren FL, Vlek AL, Mali WPt, Geerlings MI. Blood  
448 pressure, cerebral blood flow, and brain volumes. The SMART-MR study. *J*  
449 *Hypertens*. 2010;28(7):1498-1505. doi:10.1097/HJH.0b013e32833951ef.
- 450 36. Kennedy KM, Erickson KI, Rodrigue KM, et al. Age-related differences in regional  
451 brain volumes: A comparison of optimized voxel-based morphometry to manual  
452 volumetry. *Neurobiol Aging*. 2009;30(10):1657-1676.  
453 doi:10.1016/j.neurobiolaging.2007.12.020.
- 454 37. Tardif CL, Steele CJ, Lampe L, et al. Investigation of the confounding effects of  
455 vasculature and metabolism on computational anatomy studies. *Neuroimage*.  
456 2017;149:233-243. doi:10.1016/j.neuroimage.2017.01.025.
- 457 38. Strong JP, Malcom GT, McMahan CA, et al. Prevalence and Extent of Atherosclerosis  
458 in Adolescents and Young Adults. *JAMA*. 1999;281(8):727-735.  
459 doi:10.1001/jama.281.8.727.
- 460 39. Maillard P, Mitchell GF, Himali JJ, et al. Effects of arterial stiffness on brain integrity in  
461 young adults from the framingham heart study. *Stroke*. 2016;47(4):1030-1036.  
462 doi:10.1161/STROKEAHA.116.012949.

463

## Tables and Figures

**Table 1 – Sample characteristics.**

Characteristics of the total sample by blood pressure categories in means (standard deviations) for continuous variables or number of cases, n, (percentages) for categorical variables. Column *p* specifies significant results of comparisons between blood pressure categories: empty cells =  $p > 0.05$ . Column *Pairwise comparisons* specifies significant post-hoc comparisons for: 2=category 1 vs. 2, 3=category 1 vs. 3, 4=category 1 vs. 4. \*\*\*= $p < 0.001$ , \*\*= $p < 0.01$ , \*= $p < 0.05$ . Definition of blood pressure categories: *category 1* (SBP < 120 mmHg and DBP < 80 mmHg), *category 2* (SBP 120-129 mmHg or DBP 80-84 mmHg), *category 3* (SBP 130-139 mmHg or DBP 85-89 mmHg) and *category 4* (SBP ≥ 140 mmHg or DBP ≥ 90 mmHg).

|                                      |                   | Total                              |       | Category 1 |      | Category 2 |      | Category 3 |      | Category 4 |      |          |                      |
|--------------------------------------|-------------------|------------------------------------|-------|------------|------|------------|------|------------|------|------------|------|----------|----------------------|
|                                      |                   | Mean (standard deviation) or n (%) |       |            |      |            |      |            |      |            |      |          | Pairwise comparisons |
|                                      |                   |                                    |       |            |      |            |      |            |      |            |      | <i>p</i> |                      |
| n                                    |                   | 423                                | 100   | 175        | 41   | 121        | 29   | 80         | 19   | 47         | 11   |          |                      |
|                                      | Women             | 177                                | 42    | 117        | 67   | 40         | 33   | 11         | 14   | 9          | 19   | ***      | 2***, 3***, 4***     |
| Age (years)                          |                   | 27.66                              | 5.27  | 27.61      | 5.53 | 27.30      | 4.95 | 28.01      | 5.24 | 28.21      | 5.23 |          |                      |
|                                      | Min-Max           | 19-40                              |       | 19-40      |      | 20-40      |      | 20-40      |      | 20-39      |      |          |                      |
| Systolic Blood Pressure (SBP, mmHg)  |                   | 123.2                              | 12.19 | 111.91     | 5.44 | 123.99     | 3.62 | 134.57     | 3.48 | 143.56     | 7.76 | ***      | 2***, 3***, 4***     |
| Diastolic Blood Pressure (DBP, mmHg) |                   | 73.38                              | 8.49  | 67.67      | 5.81 | 73.64      | 5.77 | 78.79      | 6.46 | 84.75      | 8.26 | ***      | 2***, 3***, 4***     |
| Body Mass Index (kg/m <sup>2</sup> ) |                   | 23.48                              | 3.25  | 22.60      | 2.74 | 23.45      | 3.23 | 24.22      | 3.42 | 25.59      | 3.62 | ***      | 2*, 3**, 4***        |
|                                      | missing values    | 13                                 | 3     | 5          | 3    | 4          | 3    | 1          | 1    | 3          | 6    |          |                      |
|                                      | Min-Max           | 17.96-36.93                        |       |            |      |            |      |            |      |            |      |          |                      |
| Smoking status                       |                   |                                    |       |            |      |            |      |            |      |            |      |          |                      |
|                                      | non-smoker        | 273                                | 65    | 113        | 65   | 78         | 64   | 53         | 66   | 29         | 62   |          |                      |
|                                      | occasional smoker | 57                                 | 13    | 23         | 13   | 17         | 14   | 13         | 16   | 4          | 9    |          |                      |
|                                      | smoker            | 73                                 | 17    | 29         | 17   | 21         | 17   | 13         | 16   | 10         | 21   |          |                      |
|                                      | missing values    | 20                                 | 5     | 10         | 6    | 5          | 4    | 1          | 1    | 4          | 9    |          |                      |
| Fazekas score                        |                   |                                    |       |            |      |            |      |            |      |            |      |          |                      |
|                                      | 0                 | 303                                | 72    | 123        | 70   | 85         | 70   | 59         | 74   | 36         | 77   |          |                      |
|                                      | 1                 | 72                                 | 17    | 39         | 22   | 16         | 13   | 10         | 13   | 7          | 15   |          |                      |
|                                      | 2                 | 0                                  | 0     | 0          | 0    | 0          | 0    | 0          | 0    | 0          | 0    |          |                      |
|                                      | 3                 | 0                                  | 0     | 0          | 0    | 0          | 0    | 0          | 0    | 0          | 0    |          |                      |

|                                 | missing values | 48      | 11     | 13      | 7      | 20      | 17     | 11      | 14     | 4       | 9      |
|---------------------------------|----------------|---------|--------|---------|--------|---------|--------|---------|--------|---------|--------|
| Total intracranial volume (ml)  |                | 1450.05 | 137.39 | 1400.49 | 127.47 | 1457.43 | 142.07 | 1508.05 | 116.23 | 1516.90 | 126.29 |
| Grey matter volume (ml)         |                | 777.41  | 88.69  | 748.55  | 79.50  | 784.29  | 90.41  | 809.72  | 87.36  | 812.16  | 86.47  |
| White matter volume (ml)        |                | 449.79  | 55.74  | 435.84  | 53.56  | 452.75  | 55.93  | 464.19  | 53.34  | 469.58  | 55.52  |
| Cerebrospinal fluid volume (ml) |                | 222.86  | 56.60  | 216.09  | 54.57  | 220.40  | 59.53  | 234.14  | 54.14  | 235.16  | 57.34  |
| Hippocampal volume, left (ml)   |                | 3.90    | 0.45   | 3.77    | 0.41   | 3.93    | 0.46   | 4.06    | 0.43   | 4.09    | 0.43   |
| Hippocampal volume, right (ml)  |                | 3.97    | 0.43   | 3.83    | 0.40   | 4.00    | 0.44   | 4.12    | 0.40   | 4.14    | 0.39   |
| Amygdalar volume, left (ml)     |                | 1.68    | 0.19   | 1.62    | 0.18   | 1.68    | 0.19   | 1.75    | 0.18   | 1.75    | 0.18   |
| Amygdalar volume, right (ml)    |                | 1.50    | 0.16   | 1.45    | 0.15   | 1.51    | 0.17   | 1.56    | 0.16   | 1.57    | 0.15   |

**Table 2 – Image-based meta-analysis results of regional grey matter volume differences associated with blood pressure.**

Image-based meta-analysis results of significant clusters yielding lower grey matter volume for the respective contrast of interest. Columns indicate cluster-specific MNI coordinates of peak voxels, meta-analytic SDM-Z-value, meta-analytic *p*-value, number of voxels in cluster and anatomical label of the peak voxel. Anatomical labels were assigned using SPM's Anatomy toolbox. Voxel threshold was set to  $p < 0.005$ , peak height threshold was set to  $\text{SDM-Z} > 1.0$  and cluster extent threshold was set to  $k \geq 10$  voxels as recommended by <sup>24</sup>. Final voxel size was  $2 \times 2 \times 2 \text{ mm}^3$ . MNI: Montreal Neurological Institute. SDM: Seed-based *d* Mapping. SBP: Systolic blood pressure. DBP: Diastolic blood pressure.

| MNI coordinates<br>(x, y, z)                                                                                                         | SDM-Z  | P-value | # Voxels | Peak Description                               |
|--------------------------------------------------------------------------------------------------------------------------------------|--------|---------|----------|------------------------------------------------|
| <i>Negative Correlation with Systolic Blood Pressure</i>                                                                             |        |         |          |                                                |
| 8,-30,56                                                                                                                             | -3.859 | 0.000   | 288      | Right paracentral lobule                       |
| -40,30,0                                                                                                                             | -3.590 | 0.000   | 49       | Left inferior frontal gyrus (p. triangularis)  |
| 36,6,34                                                                                                                              | -3.394 | 0.000   | 16       | Right inferior frontal gyrus (p. opercularis)  |
| 10,2,40                                                                                                                              | -3.325 | 0.001   | 45       | Right midcingulate cortex                      |
| -58,-20,24                                                                                                                           | -3.290 | 0.001   | 146      | Left postcentral gyrus                         |
| -52,-10,6                                                                                                                            | -3.268 | 0.001   | 78       | Left superior temporal gyrus                   |
| 48,32,10                                                                                                                             | -3.204 | 0.001   | 27       | Right inferior frontal gyrus (p. triangularis) |
| 48,0,48                                                                                                                              | -3.196 | 0.001   | 127      | Right precentral gyrus                         |
| 64,-42,12                                                                                                                            | -3.192 | 0.001   | 42       | Right superior temporal gyrus                  |
| 6,8,-18                                                                                                                              | -3.110 | 0.001   | 40       | Right subgenual cingulate cortex               |
| 50,8,28                                                                                                                              | -3.045 | 0.002   | 26       | Right inferior frontal gyrus (p. opercularis)  |
| -8,-76,18                                                                                                                            | -3.019 | 0.002   | 27       | Left cuneus cortex                             |
| 8,-28,2                                                                                                                              | -2.977 | 0.002   | 45       | Right thalamus                                 |
| 10,-68,26                                                                                                                            | -2.937 | 0.002   | 18       | Right cuneus cortex                            |
| 58,4,-8                                                                                                                              | -2.934 | 0.002   | 32       | Right temporal pole                            |
| -28,10,60                                                                                                                            | -2.896 | 0.003   | 19       | Left middle frontal gyrus                      |
| -52,-12,42                                                                                                                           | -2.860 | 0.003   | 10       | Left postcentral gyrus                         |
| <i>Negative Correlation with Diastolic Blood Pressure</i>                                                                            |        |         |          |                                                |
| -36,26,6                                                                                                                             | -3.876 | 0.000   | 266      | Left insula                                    |
| -26,24,54                                                                                                                            | -3.820 | 0.000   | 62       | Left middle frontal gyrus                      |
| 4,-34,50                                                                                                                             | -3.545 | 0.000   | 246      | Right midcingulate cortex                      |
| -60,-24,14                                                                                                                           | -3.462 | 0.000   | 90       | Left supramarginal gyrus                       |
| -46,-26,48                                                                                                                           | -3.239 | 0.001   | 59       | Left inferior parietal lobule                  |
| 44,-44,50                                                                                                                            | -3.188 | 0.001   | 18       | Right inferior parietal lobule                 |
| 36,8,32                                                                                                                              | -3.180 | 0.001   | 25       | Right inferior frontal gyrus (p. opercularis)  |
| 34,10,8                                                                                                                              | -3.139 | 0.001   | 100      | Right insula                                   |
| 28,14,60                                                                                                                             | -3.069 | 0.001   | 12       | Right superior frontal gyrus                   |
| 62,-44,16                                                                                                                            | -2.991 | 0.002   | 35       | Right superior temporal gyrus                  |
| -38,14,-20                                                                                                                           | -2.983 | 0.002   | 30       | Left temporal pole                             |
| 60,2,-12                                                                                                                             | -2.862 | 0.003   | 13       | Right superior temporal gyrus                  |
| -38,40,32                                                                                                                            | -2.845 | 0.003   | 14       | Left middle frontal gyrus                      |
| 30,28,0                                                                                                                              | -2.796 | 0.003   | 14       | Right insula                                   |
| -36,8,10                                                                                                                             | -2.788 | 0.003   | 24       | Left insula                                    |
| -58,-46,30                                                                                                                           | -2.750 | 0.004   | 11       | Left supramarginal gyrus                       |
| -34,32,32                                                                                                                            | -2.734 | 0.004   | 11       | Left middle frontal gyrus                      |
| <i>category 4 (SBP<math>\geq</math>140 mmHg or DBP<math>\geq</math>90 mmHg) &lt; category 1 (SBP&lt;120 mmHg and DBP&lt;80 mmHg)</i> |        |         |          |                                                |



|                                                                        |        |       |     |                                                |
|------------------------------------------------------------------------|--------|-------|-----|------------------------------------------------|
| -52,28,12                                                              | -3.473 | 0.000 | 107 | Left inferior frontal gyrus (p. triangularis)  |
| -48,-4,4                                                               | -3.322 | 0.000 | 93  | Left rolandic operculum                        |
| 18,-52,-48                                                             | -3.097 | 0.001 | 40  | Right cerebellum, hemispheric lobule VIIIb     |
| 40,30,26                                                               | -3.093 | 0.001 | 10  | Right inferior frontal gyrus (p. triangularis) |
| 48,32,10                                                               | -3.064 | 0.001 | 48  | Right inferior frontal gyrus (p. triangularis) |
| -38,48,-16                                                             | -3.014 | 0.001 | 40  | Left inferior frontal gyrus (p. orbitalis)     |
| -54,-12,42                                                             | -2.940 | 0.002 | 30  | Left postcentral gyrus                         |
| -8,-76,18                                                              | -2.936 | 0.002 | 14  | Left cuneus                                    |
| -16,-36,-18                                                            | -2.872 | 0.002 | 24  | Left cerebellum, hemispheric lobule V          |
| 12,-42,48                                                              | -2.854 | 0.002 | 11  | Right midcingulate cortex                      |
| -12,-50,-56                                                            | -2.849 | 0.002 | 30  | Left cerebellum, hemispheric lobule IX         |
| 10,-52,18                                                              | -2.836 | 0.002 | 21  | Right precuneus                                |
| 64,-44,14                                                              | -2.824 | 0.002 | 26  | Right superior temporal gyrus                  |
| 10,-66,28                                                              | -2.821 | 0.002 | 56  | Right precuneus                                |
| 6,-28,50                                                               | -2.792 | 0.003 | 16  | Right midcingulate cortex                      |
| 18,-54,22                                                              | -2.765 | 0.003 | 15  | Right precuneus                                |
| <i>category 3 (SBP 130-139 mmHg or DBP 85-89 mmHg) &lt; category 1</i> |        |       |     |                                                |
| 36,6,34                                                                | -3.474 | 0.000 | 179 | Right inferior frontal gyrus (p. opercularis)  |
| 6,-28,54                                                               | -3.119 | 0.000 | 179 | Right posterior-medial frontal gyrus           |
| 48,-50,20                                                              | -2.917 | 0.000 | 74  | Right middle temporal gyrus                    |
| -60,-20,36                                                             | -2.857 | 0.000 | 205 | Left postcentral gyrus                         |
| -40,30,2                                                               | -2.598 | 0.000 | 24  | Left inferior frontal gyrus (p. triangularis)  |
| 36,8,-18                                                               | -2.523 | 0.001 | 123 | N/A (Right insula)                             |
| 42,-74,12                                                              | -2.454 | 0.001 | 25  | Right middle occipital gyrus                   |
| -62,-42,28                                                             | -2.433 | 0.001 | 41  | Left supramarginal gyrus                       |
| 20,-32,6                                                               | -2.384 | 0.001 | 133 | Right thalamus                                 |
| -10,36,-6                                                              | -2.384 | 0.001 | 102 | Left anterior cingulate cortex                 |
| 28,-94,-4                                                              | -2.373 | 0.001 | 14  | Right inferior occipital gyrus                 |
| -12,-32,0                                                              | -2.264 | 0.002 | 133 | Left thalamus                                  |
| -56,-64,16                                                             | -2.222 | 0.002 | 28  | Left middle temporal gyrus                     |
| -40,8,30                                                               | -2.197 | 0.002 | 82  | Left precentral gyrus                          |
| -12,-54,14                                                             | -2.187 | 0.002 | 20  | Left precuneus                                 |
| <i>category 2 (SBP 120-129 mmHg or DBP 80-84 mmHg) &lt; category 1</i> |        |       |     |                                                |
| -54,-10,14                                                             | -3.407 | 0.000 | 230 | Left rolandic operculum                        |
| 30,-96,-8                                                              | -3.290 | 0.000 | 102 | Right inferior occipital gyrus                 |
| -34,-16,-30                                                            | -3.164 | 0.000 | 133 | Left fusiform gyrus                            |
| -8,-54,22                                                              | -3.084 | 0.000 | 433 | Left precuneus                                 |
| 54,-24,32                                                              | -2.968 | 0.000 | 31  | Right supramarginal gyrus                      |
| -46,28,0                                                               | -2.942 | 0.000 | 41  | Left inferior frontal gyrus (p. triangularis)  |
| -64,-20,30                                                             | -2.939 | 0.000 | 227 | Left postcentral gyrus                         |
| -62,-42,34                                                             | -2.876 | 0.000 | 68  | Left supramarginal gyrus                       |
| -36,-64,42                                                             | -2.827 | 0.001 | 30  | Left angular gyrus                             |
| 18,-72,54                                                              | -2.804 | 0.001 | 40  | Right superior parietal lobule                 |
| 46,-74,12                                                              | -2.734 | 0.001 | 26  | Right middle temporal gyrus                    |
| 8,-18,46                                                               | -2.647 | 0.001 | 32  | Right midcingulate cortex                      |
| 56,-32,12                                                              | -2.470 | 0.002 | 52  | Right superior temporal gyrus                  |

|             |        |       |    |                                    |
|-------------|--------|-------|----|------------------------------------|
| 28,-72,-38  | -2.413 | 0.002 | 23 | Right cerebellum, crus I           |
| -62,-22,-30 | -2.403 | 0.003 | 11 | N/A (Left inferior temporal gyrus) |

---

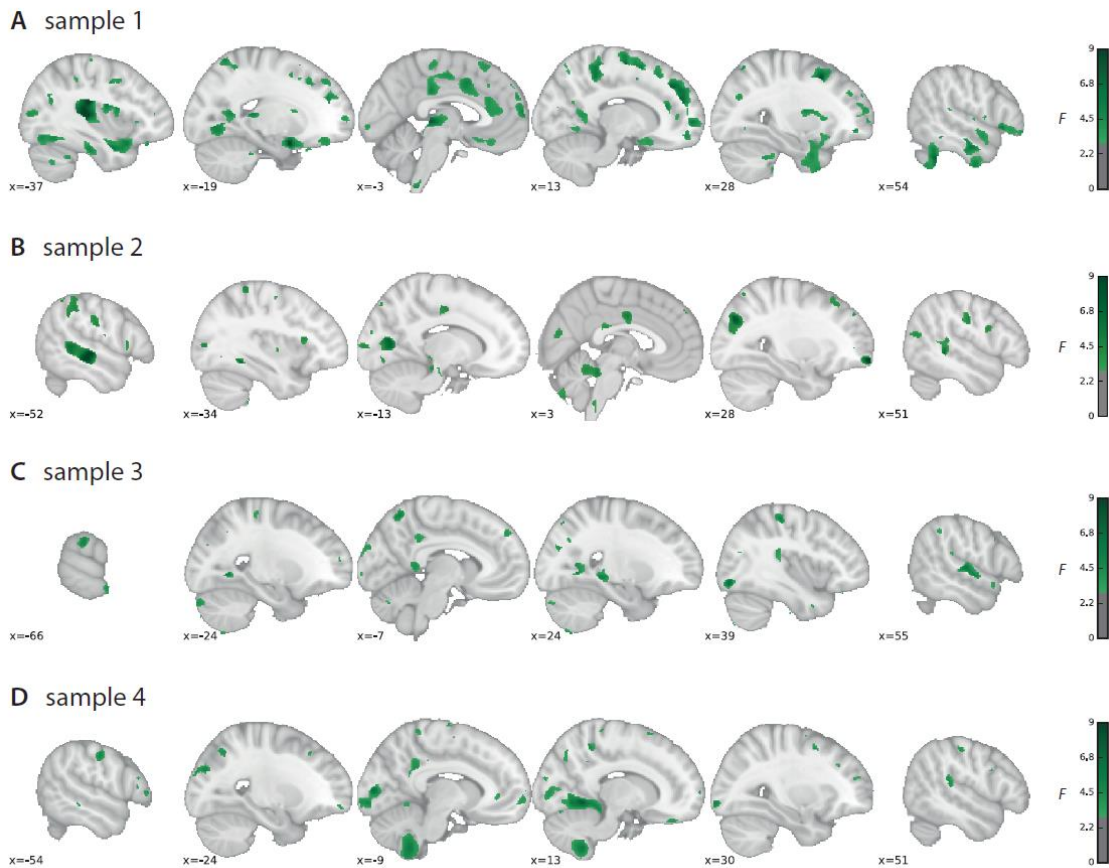

**Figure 1 – Associations between grey matter volume and blood pressure within each sample.** Sagittal views of VBM  $F$ -contrast results showing the overall effect of BP category on GM volume per sample. Each sample is represented in one row (A-D). Slice order runs from left hemisphere (left-hand side of the plot) to right hemisphere (right-hand side of the plot). Color bars represent  $F$ -values (uncorrected). Sample sizes: sample 1  $n = 81$ ; sample 2  $n = 52$ ; sample 3  $n = 70$ ; sample 4  $n = 220$ . 3D-volumetric results of these analyses can be inspected in detail on <http://neurovault.org/collections/FDWHFSYZ/>. VBM: Voxel-based morphometry. BP: Blood Pressure. GM: Grey Matter.

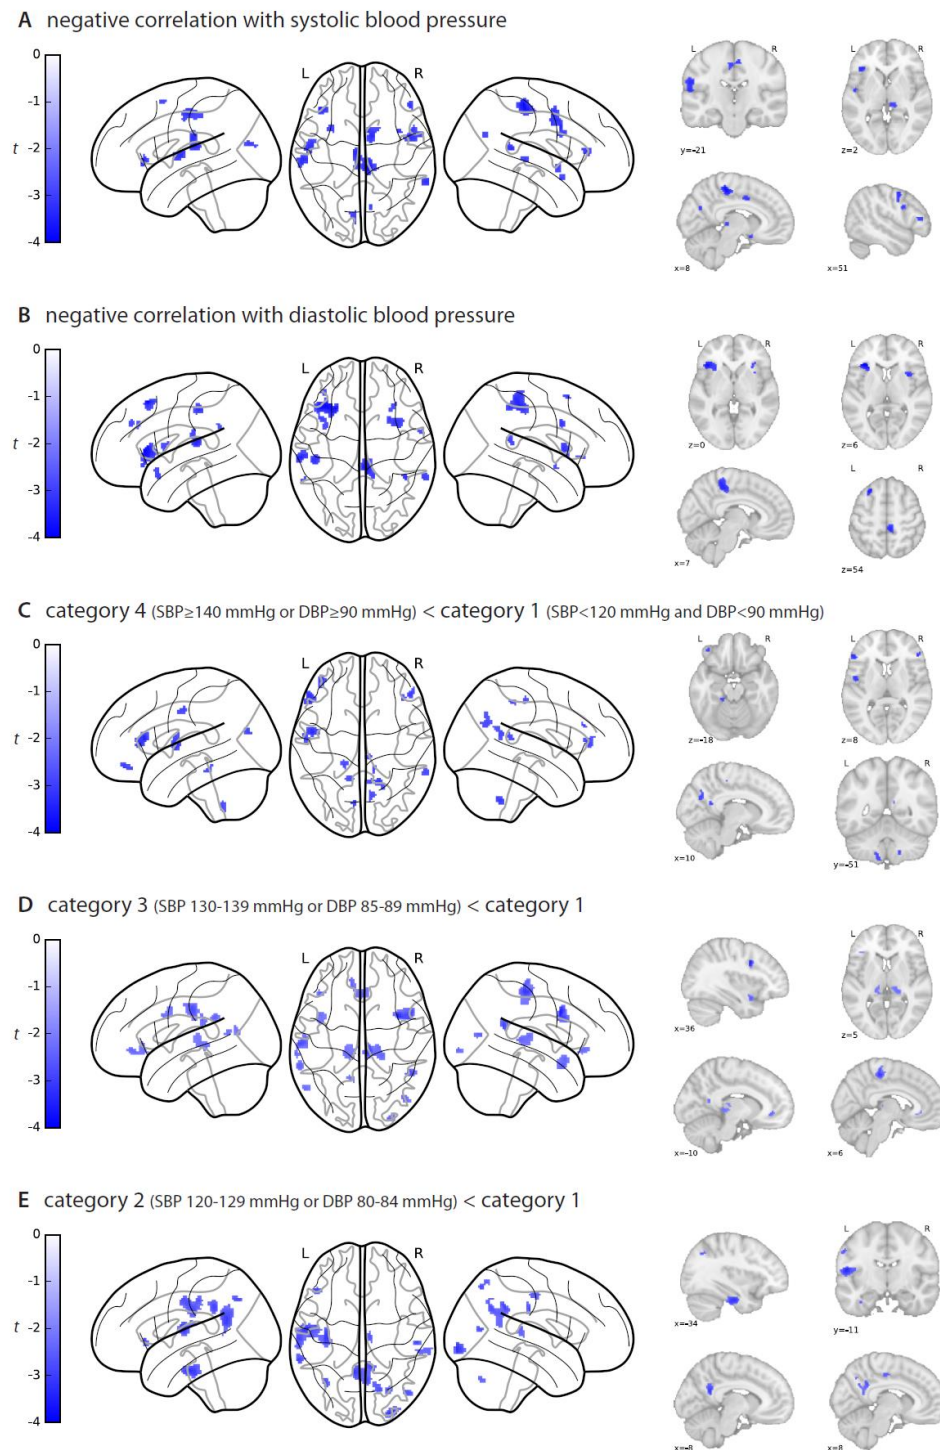

**Figure 2 – Meta-analytic differences in grey matter volume between blood pressure categories.**

Glass brain views of image-based meta-analysis results for the blood pressure category contrasts of interest with relevant slice views below (A-E). A and B depict negative correlations between SBP/DBP and gray matter volume, respectively. Blue clusters indicate meta-analytic grey matter volume differences for the given contrast at a voxel threshold of  $p < 0.005$  with peak height threshold of  $\text{SDM-Z} < -1.0$  and cluster extent threshold of  $k \geq 10$  (validated for high meta-analytic sensitivity and specificity<sup>24</sup>). Color bars represent SDM-Z-values. 3D-volumetric results of these analyses can be inspected in detail on <http://neurovault.org/collections/FDWHFSYZ/>. SDM: Seed-based  $d$  Mapping. SBP: Systolic blood pressure. DBP: Diastolic blood pressure. L: Left hemisphere. R: Right hemisphere.

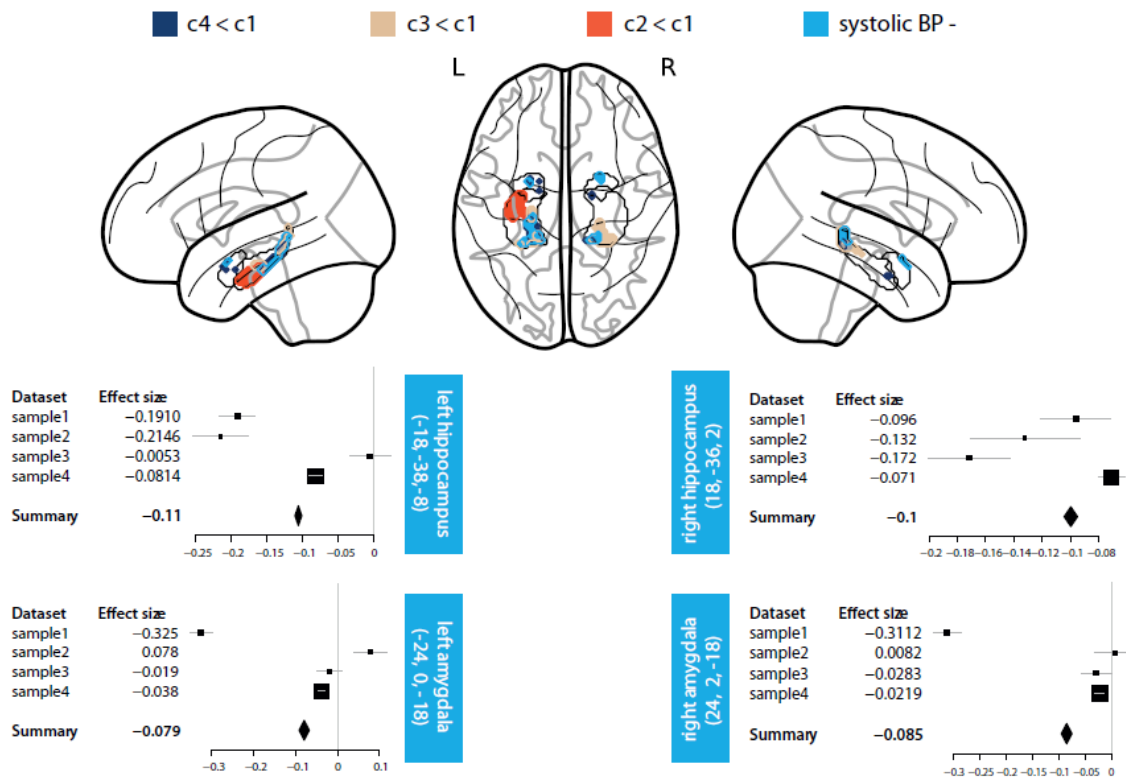

**Figure 3 – Meta-analytic differences in volumes of hippocampus and amygdala (Region-of-Interest analysis).** Upper part of plot: Glass brain views of image-based meta-analysis ROI results for the blood pressure category contrasts of interest in bilateral hippocampus and amygdala masks. Voxel threshold was set to  $p < 0.05$  with a peak height threshold of  $\text{SDM-Z} < -1.0$  and a cluster extent threshold of  $k \geq 1$ . Lower part of plot: Exemplary forest plots of sample-specific peak voxels' effect sizes for the negative correlation with SBP in the respective ROI. The box sizes are determined by each sample's weight. Light blue boxes include ROI name and MNI coordinates of the peak voxel. Definition of blood pressure categories: *category 1* (SBP < 120 mmHg and DBP < 80 mmHg), *category 2* (SBP 120-129 mmHg or DBP 80-84 mmHg), *category 3* (SBP 130-139 mmHg or DBP 85-89 mmHg) and *category 4* (SBP  $\geq$  140 mmHg or DBP  $\geq$  90 mmHg). ROI: Region of Interest. SDM: Seed-based  $d$  Mapping. MNI: Montreal Neurological Institute. SBP: Systolic blood pressure. DBP: Diastolic blood pressure. L: Left hemisphere. R: Right hemisphere.

## Supplementary Material

### Methods

#### Blood pressure measurements

Systolic (SBP) and diastolic blood pressure (DBP) were measured using an automatic oscillometric blood pressure monitor (OMRON M500 (samples 1-3), 705IT (sample 4), OMRON Medizintechnik, Mannheim, Germany) after a seated resting period of 5 min. In sample 1, measurements were taken from participants' left arms on three separate occasions within two weeks. In sample 2, measurements were taken from participants' left arms on two separate occasions on the same day. In sample 3, blood pressure was measured once before participants underwent MRI. In sample 4, the procedure consisted of three consecutive blood pressure measurements, taken from the right arm in intervals of 3 minutes. In each sample, all available measurements per participant were averaged to one systolic and one diastolic blood pressure value. These averages were used for classification of BP.

#### Neuroimaging

MRI was performed at the same 3 Tesla MAGNETOM Verio Scanner (Siemens, Erlangen, Germany) for all studies with a 32-channel head coil. Whole-brain 3-dimensional T1-weighted volumes with a resolution of 1 mm isotropic were acquired for the assessment of brain structure. T1-weighted images in sample 4 were acquired with a standard MPRAGE protocol, while T1-weighted images in samples 1-3 resulted from an MP2RAGE protocol (sequence parameters in supplementary Table 2). Grey and white matter contrast are comparable for the two sequence protocols<sup>1,2</sup>, but additional preprocessing steps were performed for MP2RAGE T1-weighted images (see below). Fluid-attenuated inversion recovery (FLAIR) images were acquired in all samples for radiological examination for incidental findings and for Fazekas scale ratings for white matter lesions (Table 1).

#### Additional preprocessing steps for MP2RAGE images

Before segmentation, T1-weighted images acquired with an MP2RAGE sequence were additionally masked to remove noise signal outside of the brain (following the procedure described in<sup>2</sup>): a binarized brain mask was created from the second inversion-contrast volume by setting voxels with intensities of less than 10% of the maximum signal to zero. Any holes in the mask were filled. For the final image, the mask was multiplied with the T1-weighted volume which eliminated background noise but preserved signals from the brain and other tissues. All of these steps were performed with tools in FSL 5.0<sup>3</sup> ([www.fmrib.ox.ac.uk/fsl](http://www.fmrib.ox.ac.uk/fsl)).

T1-weighted images from MP2RAGE are free of magnetic field inhomogeneity (they are also named *uniform*). Thus, a correction for this bias was omitted and only applied to MPRAGE images. Bias correction for MPRAGE images followed the default settings within SPM12's *segment* batch. All other processing steps were identical for the pulse sequences.

#### Voxel-based morphometry (VBM) and statistical analysis of regional GMV and BP within each sample

T1-weighted images were processed by using voxel-based morphometry (VBM) and the diffeomorphic anatomical registration using exponentiated lie algebra (DARTEL) method<sup>4,5</sup> within SPM12 (12.6685, Wellcome Trust Centre for Neuroimaging, UCL, London, UK; <http://www.fil.ion.ucl.ac.uk/spm12/>) running under Matlab 9.0.0 (R2016a, MathWorks, Natick, MA, USA). In short, processing of grey matter volume (GMV) probabilities included segmentation into tissue types, sample-specific DARTEL template creation, modulation of grey matter voxels to preserve tissue properties, normalization to MNI space, and 8 mm full-width-at-half-maximum Gaussian smoothing.

Voxel-wise statistical tests were performed in SPM12 to relate BP and GMV within each sample. We first performed a whole-brain analysis, testing for a continuous relationship between GMV and SBP and DBP, respectively, with a linear regression t-contrast. Next we tested for differences in GMV between BP categories. The general linear model for this whole-brain analysis included a factor for BP as variable of interest (levels: (1) category 4, (2) category 3, (3) category 2, (4) category 1). Within each sample, the overall effect of BP category on GMV was tested with an Analysis of Variance (ANOVA) *F*-contrast and the following *t*-contrasts tested pairwise comparisons of interest: (1) category 4 vs. category 1, (2) category 3 vs. category 1, (3) category 2 vs. category 1. All models included total intracranial volume (TIV), gender and age as covariates of no interest. Each *t*-contrast was tested in negative and positive direction (i.e. category A < category B and category A > category B). Data on all effects can be found online in the public repository NeuroVault<sup>6</sup> (<http://neurovault.org/collections/FDWHFSYZ/>).

### **Image-based meta-analysis (IBMA): association of regional GMV and BP across samples**

To evaluate cumulative results from all samples, we combined the results of each sample in an image-based meta-analysis. The meta-analysis was performed with Anisotropic Effect-Size Signed Differential Mapping (AES-SDM) implemented in the SDM software package using default parameters<sup>7</sup> (<http://www.sdmproject.com/>, <http://www.sdmproject.com/software/tutorial.pdf>). For each sample and  $t$ -contrast, unthresholded whole-brain  $t$ -statistic maps were converted to Hedges'  $g$  effect size maps and variance maps. To assess weighted mean differences in grey matter across all samples, a meta-analytic model was set up for each voxel. Within this random-effects model, samples are weighted by their sample size, within-study variance and between-study heterogeneity. The result is a mean map of  $z$ -values which are quotients of the mean effect-sizes and their standard errors. Since these  $z$ -values are not normally distributed, null distributions were estimated empirically by Monte Carlo randomizations. Voxels in the mean map were randomly permuted within a software-implemented grey matter mask to create null distributions for the assessment of critical  $z$ -values. We applied 50 permutations, while statistical stability has been shown from 20 permutations on<sup>7</sup>. Statistical significance was evaluated according to validated thresholds of high meta-analytic sensitivity and specificity<sup>7</sup>: voxel threshold= $p < 0.005$ , peak height threshold= $\text{SDM-Z} > 1.0$  and cluster extent threshold= $k \geq 10$  voxels. Anatomy toolbox<sup>8</sup> (version 2.2 for SPM8) was used to automatically label significant clusters in all analyses. Nilearn<sup>9</sup> (version 0.2.6, <https://nilearn.github.io/index.html>) was used to visualize statistical brain maps.

### **IBMA of regions of interest (ROI): association of regional GMV and BP across samples in hippocampus and amygdala**

With the meta-analysis approach we also tested if specific regions of interest (ROI) that included bilateral hippocampus and bilateral amygdala differed in their volumes related to SBP, DBP and between BP categories. Separate IBMAs were calculated within binary atlas-defined masks for bilateral hippocampus and bilateral amygdala that were retrieved from the latest available version of the Anatomy toolbox<sup>8</sup> (2.2 for SPM8). Peak voxels' effect sizes were extracted with SDM software's *Extract* option and plotted as forest plots (Figure 3) with R (3.2.3, R Core Team, 2015, Vienna, Austria; <https://www.R-project.org/>) and the package *rmeta* (2.16).

### **Volumetry: association of total brain volumes and BP within the pooled sample**

In addition to VBM and IBMA, we explored if total brain volumes (average volume over all voxels within a region) differed between BP categories. Specifically, we tested if estimated total intracranial volume, total grey matter volume, total white matter volume (WMV), total cerebrospinal fluid volume (CSFV), total left and right hippocampal and amygdalar volume differed between BP categories. For these comparisons within the total sample, we defined correlation models (for SBP and DBP as independent variable, respectively) and ANOVA models for BP category as independent variable. The models included the respective volume as dependent variable, as well as TIV (where applicable), gender, age, and sample (where applicable) as covariates. We considered  $p$ -values  $< 0.05$  as significant. The analyses were performed with R (3.2.3, R Core Team, 2015, Vienna, Austria; <https://www.R-project.org/>).

## **Supplementary Results**

### **Volumetry in pooled sample: association of total brain volumes and BP**

None of the volumetric brain measures (TIV, total GMV, total, WMV, total CSFV, total hippocampal and total amygdalar volume) were significantly associated with SBP or DBP in the correlation models, nor with BP categories in the ANOVA models (all  $p > 0.05$ , Table 1).



## Supplementary Tables

**Supplementary Table (eTable) 1 – List of exclusion criteria for each study from which the samples were drawn.**

| Study                                                                 | Exclusion criteria                                                                                                                                                                                                                                                                                                                                                                                                                                                                                                                                                                                                                                                                                                                                                                                                                                                                                                                                                                                                                                                                                                                                                                                                                                                                                                                                                                                                                                                                                                                                                                     |
|-----------------------------------------------------------------------|----------------------------------------------------------------------------------------------------------------------------------------------------------------------------------------------------------------------------------------------------------------------------------------------------------------------------------------------------------------------------------------------------------------------------------------------------------------------------------------------------------------------------------------------------------------------------------------------------------------------------------------------------------------------------------------------------------------------------------------------------------------------------------------------------------------------------------------------------------------------------------------------------------------------------------------------------------------------------------------------------------------------------------------------------------------------------------------------------------------------------------------------------------------------------------------------------------------------------------------------------------------------------------------------------------------------------------------------------------------------------------------------------------------------------------------------------------------------------------------------------------------------------------------------------------------------------------------|
| <b>Leipzig Study for Mind-Body-Emotion Interactions (sample 1)</b>    | <ul style="list-style-type: none"> <li>• Age &lt;20 or 36-58 or &gt;77</li> <li>• Self-reported diagnosis of hypertension without intake of antihypertensive medication</li> <li>• Any other cardiovascular disease (e.g. heart attack, congenital heart defect)</li> <li>• History of psychiatric diseases that required inpatient treatment for longer than 2 weeks within the last 10 years (e.g. psychosis, attempted suicide, post-traumatic stress disorder)</li> <li>• History of neurological disorders (incl. multiple sclerosis, stroke, epilepsy, brain tumor, meningoencephalitis, severe concussion)</li> <li>• History of malignant diseases</li> <li>• Intake of one of the following medications:               <ul style="list-style-type: none"> <li>• Any centrally active drugs (including Hypericum perforatum)</li> <li>• Beta- and alpha-blocker</li> <li>• Cortisol</li> <li>• Any chemotherapeutic or psychopharmacological medication</li> </ul> </li> <li>• Positive drug anamnesis (extensive alcohol, MDMA, amphetamines, cocaine, opiates, benzodiazepine, cannabis)</li> <li>• Body Mass Index &lt; 18 or &gt; 30</li> <li>• Previous participation in any scientific study</li> <li>• Past or present student of Psychology</li> <li>• MRI exclusion criteria including:               <ul style="list-style-type: none"> <li>• Any metallic implants, braces, non-removable piercings</li> <li>• Tattoos</li> <li>• Pregnancy</li> <li>• Claustrophobia</li> <li>• Tinnitus</li> <li>• Surgical operation in the last 3 months</li> </ul> </li> </ul> |
| <b>Neural Consequences of Stress Study (sample 2)</b>                 | <ul style="list-style-type: none"> <li>• Female gender</li> <li>• Age &lt; 20 or &gt;35</li> <li>• Smoking</li> <li>• Past or present student of Psychology</li> <li>• Excessive alcohol or drug consumption</li> <li>• Regular medication intake</li> <li>• History of cardiovascular or neurological diseases</li> <li>• Body Mass Index &gt; 27</li> <li>• Positive drug anamnesis (extensive alcohol, MDMA, amphetamines, cocaine, opiates, benzodiazepine, cannabis)</li> <li>• Positive diagnosis in psychiatric screening of axis I disorders</li> <li>• Abnormalities in analysis of blood screening</li> <li>• MRI exclusion criteria including:               <ul style="list-style-type: none"> <li>• Any metallic implants, braces, non-removable piercings</li> <li>• Tattoos</li> <li>• Pregnancy</li> <li>• Claustrophobia</li> <li>• Tinnitus</li> <li>• Surgical operation in the last 3 months</li> </ul> </li> </ul>                                                                                                                                                                                                                                                                                                                                                                                                                                                                                                                                                                                                                                                |
| <b>Neuroanatomy and Connectivity Protocol<sup>10</sup> (sample 3)</b> | <ul style="list-style-type: none"> <li>• Age &lt; 20 or &gt;75</li> <li>• History of psychiatric diseases that required inpatient treatment for longer than 2 weeks within the last 10 years (e.g. psychosis, attempted suicide, post-traumatic stress disorder)</li> <li>• History of neurological disorders (incl. multiple sclerosis, stroke, epilepsy, brain tumor, meningoencephalitis, severe concussion)</li> <li>• History of malignant diseases</li> <li>• Intake of one of the following medications:               <ul style="list-style-type: none"> <li>• Any centrally active drugs (including Hypericum perforatum)</li> <li>• Beta-and alpha-blocker</li> <li>• Cortisol</li> <li>• Any chemotherapeutic or psychopharmacological medication</li> </ul> </li> <li>• Positive drug anamnesis (extensive alcohol, MDMA, amphetamines, cocaine, opiates, benzodiazepine, cannabis)</li> <li>• Body Mass Index &lt;18 or &gt;30</li> <li>• Extensive testing experience at the Max-Planck-Institute or other academic institution</li> <li>• Past or present student of Psychology</li> <li>• MRI exclusion criteria:               <ul style="list-style-type: none"> <li>• Any metallic implants, braces, non-removable piercings</li> <li>• Tattoos</li> <li>• Pregnancy</li> <li>• Claustrophobia</li> </ul> </li> </ul>                                                                                                                                                                                                                                               |

|                                                                                         |                                                                                                                                                                                                                                                                                                                                                                                                                                                                                                                                                                                                                                                                                                                                                                                                                                          |
|-----------------------------------------------------------------------------------------|------------------------------------------------------------------------------------------------------------------------------------------------------------------------------------------------------------------------------------------------------------------------------------------------------------------------------------------------------------------------------------------------------------------------------------------------------------------------------------------------------------------------------------------------------------------------------------------------------------------------------------------------------------------------------------------------------------------------------------------------------------------------------------------------------------------------------------------|
|                                                                                         | <ul style="list-style-type: none"> <li>• Tinnitus</li> <li>• Surgical operation in the last 3 months</li> </ul>                                                                                                                                                                                                                                                                                                                                                                                                                                                                                                                                                                                                                                                                                                                          |
| <p><b>Leipzig Research Centre for Civilization Diseases<sup>11</sup> (sample 4)</b></p> | <ul style="list-style-type: none"> <li>• History of neurological disorders (incl. multiple sclerosis, stroke, epilepsy, parkinson's disease, brain tumor)</li> <li>• History of malignant diseases</li> <li>• History of depression</li> <li>• History of cardiovascular disease (e.g. myoinfarction, coronary heart disease, heart surgery, bypass, catheter, stent)</li> <li>• Hypertension</li> <li>• Intake of anti-hypertensive drugs</li> <li>• Intake of centrally-active drugs</li> <li>• Diabetes (Type I or II)</li> <li>• MRI exclusion criteria:             <ul style="list-style-type: none"> <li>• Any metallic implants, braces, non-removable piercings</li> <li>• Tattoos</li> <li>• Pregnancy</li> <li>• Claustrophobia</li> <li>• Tinnitus</li> </ul> </li> <li>• Surgical operation in the last 3 months</li> </ul> |

**Supplementary Table 2 - T1-weighted imaging protocols.**

|                               | MPRAGE (sample 4) | MP2RAGE (samples 1-3) |
|-------------------------------|-------------------|-----------------------|
| TI (ms)                       | 900               | 1) 700, 2) 2500       |
| TR (ms)                       | 2300              | 5000                  |
| TE (ms)                       | 2.98              | 2.92                  |
| FA (°)                        | 9                 | 1) 4, 2) 5            |
| FOV (mm <sup>3</sup> )        | 256 x 240 x 176   | 256 x 240 x 176       |
| voxel size (mm <sup>3</sup> ) | 1 x 1 x 1         | 1 x 1 x 1             |

TI: inversion time; TR: repetition time; TE: echo time; FA: flip angle; FOV: field of view

## Supplementary Figures

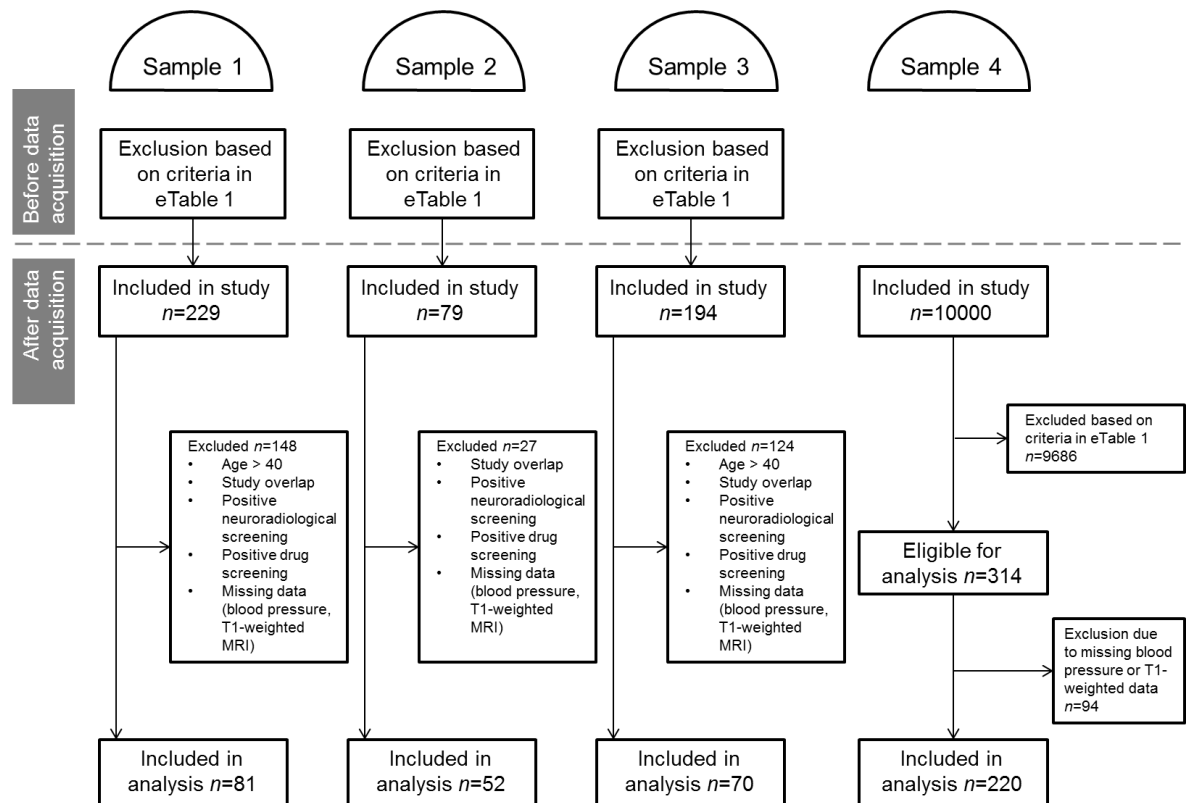

**Supplementary Figure 1 – Flow chart with inclusion procedure for the four samples.** Sample 1: Leipzig Study for Mind-Body-Emotion Interactions. Sample 2: Neural Consequences of Stress Study. 3: Neuroanatomy and Connectivity Protocol<sup>10</sup>. 4: Leipzig Research Centre for Civilization Diseases<sup>11</sup>.

## References

- 1 Marques JP, Kober T, Krueger G, van der Zwaag W, Van de Moortele P-F, Gruetter R. MP2RAGE, a self bias-field corrected sequence for improved segmentation and T1-mapping at high field. *Neuroimage* 2010; **49**: 1271–81.
- 2 Streitbürger D-P, Pampel A, Krueger G, *et al.* Impact of image acquisition on voxel-based-morphometry investigations of age-related structural brain changes. *Neuroimage* 2014; **87**: 170–82.
- 3 Jenkinson M, Beckmann CF, Behrens TEJ, Woolrich MW, Smith SM. FSL. *Neuroimage* 2012; **62**: 782–90.
- 4 Ashburner J, Friston KJ. Voxel-based morphometry--the methods. *Neuroimage* 2000; **11**: 805–21.
- 5 Ashburner J. A fast diffeomorphic image registration algorithm. *Neuroimage* 2007; **38**: 95–113.
- 6 Gorgolewski KJ, Varoquaux G, Rivera G, *et al.* NeuroVault.org: a web-based repository for collecting and sharing unthresholded statistical maps of the human brain. *Front Neuroinform* 2015; **9**: 8.
- 7 Radua J, Mataix-Cols D, Phillips ML, *et al.* A new meta-analytic method for neuroimaging studies that combines reported peak coordinates and statistical parametric maps. *Eur Psychiatry* 2012; **27**: 605–11.
- 8 Eickhoff SB, Paus T, Caspers S, *et al.* Assignment of functional activations to probabilistic cytoarchitectonic areas revisited. *Neuroimage* 2007; **36**: 511–21.
- 9 Abraham A, Pedregosa F, Eickenberg M, *et al.* Machine learning for neuroimaging with scikit-learn. *Front Neuroinform* 2014; **8**: 14.
- 10 Mendes N, Oligschlaeger S, Lauckner ME, *et al.* A functional connectome phenotyping dataset including cognitive state and personality measures. *bioRxiv* 2017. <http://www.biorxiv.org/content/early/2017/07/18/164764>.
- 11 Loeffler M, Engel C, Ahnert P, *et al.* The LIFE-Adult-Study: objectives and design of a population-based cohort study with 10,000 deeply phenotyped adults in Germany. *BMC Public Health* 2015; **15**: 691.
